# Supplementary material for: Dynamic development of starch granules and the regulation of starch biosynthesis in Brachypodium distachyon: comparison with common wheat and Aegilops peregrina
Source: PubMed Central journal article supplement (PMC4256708; doi:10.1186/s12870-014-0198-2), 2014-08-06
Supplement: 12870_2014_198_MOESM9_ESM.pdf [file 12870_2014_198_MOESM9_ESM.pdf]

| Gene    | Forward primer(5'-3')   | Reverse primer(5'-3')  | Amplicon<br>length (bp) | Efficiencies<br>(CS) | R <sub>2</sub><br>(CS) | Efficiencies<br>(Ae.P) | R <sub>2</sub><br>(Ae.P) |
|---------|-------------------------|------------------------|-------------------------|----------------------|------------------------|------------------------|--------------------------|
| ADP     | GCTCTCCAACAACATTGCCAAC  | GCTTCTGCCTGTCACATACGC  | 126 bp                  | 100.7%               | 0.999                  | 100.9%                 | 0.991                    |
| Ubi4    | TGACACCATCGACAACGTGA    | GAGGGTGGACTCCTTCTGGA   | 126 bp                  | 96.7%                | 0.983                  | 98.9%                  | 0.990                    |
| GBSS I  | CTGGTCACGTCCCAGCTC      | ACGAACACGAGGTTTCATGC   | 321bp                   | 90.2%                | 0.999                  | 105.2%                 | 0.998                    |
| SS I    | GCAAAAGGAGAGGAGGGTACA   | ACGTATGGTCTTTCGTCATGC  | 236bp                   | 92.4%                | 0.995                  | 99.5%                  | 0.996                    |
| SS II a | CCTGAGCACTACCTGGAACACTT | TCTGCCGTATGATGTCGTGAA  | 175bp                   | 92.0%                | 0.992                  | 102%                   | 0.991                    |
| SS II b | GCTGAAGACGGTGGAAAGGC    | TCGGGTGTAGTTGGTGTAGTCG | 154bp                   | 100.4%               | 0.992                  | 101.6%                 | 0.989                    |
| SS II c | ACACTGCTGCTAAACGCTAT    | TTGGCTCTGACAGGAAAGAT   | 209bp                   | 99.9%                | 0.994                  | 103.0%                 | 0.986                    |
| SSIIIa  | AGTCGGAGGGTTGGTTTA      | ATCCCATTCCTGTTGTCATA   | 196bp                   | 97.4%                | 0.996                  | 97.1%                  | 0.983                    |
| SBE1    | GGCCCAGTACAACGATCACT    | CTTTGACACGAGTGGCTTCA   | 257bp                   | 105.3%               | 0.997                  | 100.3%                 | 0.990                    |
| SBE2a   | TCGTGGCATAGCATTACAT     | GAGTTTGCGGACCTCTTG     | 239bp                   | 93.3%                | 0.997                  | 102.8%                 | 0.989                    |
| SBE2b   | CTTTGGTGGATTTGGTAGG     | TTAGTTCATTGGAGCATAGACA | 130bp                   | 91.5%                | 0.994                  | 99.7%                  | 0.989                    |
| SBE3    | CAGTTCATCGCCTTCCTA      | CCTCATTTCAACCCAGTAA    | 133bp                   | 102.1%               | 0.983                  | 102.3%                 | 0.999                    |
| ISA1    | TGAATCGGACTGGGAACG      | CACCACGACATTGGAAACAT   | 131bp                   | 94.5%                | 0.998                  | 96.5%                  | 0.996                    |
| ISA2    | AGAGGCTAAGGCAGATAAGG    | CGAACCAGCAGAGGAGTG     | 291bp                   | 100.2%               | 0.997                  | 101.2%                 | 0.997                    |
| ISA3    | TGCGGGAATACTAAACT       | GAGGAGCATCAAGAGGACTA   | 157bp                   | 106.9%               | 0.985                  | 103.6%                 | 0.998                    |
| PUL     | TCATCTCCGCTTTTTTCGTCT   | TACTTCGTGCGGACACACAT   | 272bp                   | 96.5%                | 0.997                  | 98.7%                  | 0.997                    |
